# Supplementary material
Source: Springer Nature journal article supplement (https://www.springermedizin.de/resource/supplementary/13045_2012_229_MOESM1_ESM.pdf/9660896)

VAD  
(vincristine, adriamycin,  
dexamethasone)

<75% paraprotein  
reduction

<75% paraprotein  
reduction

Autologous  
transplantation

Bortezomib-thalidomide  
-dexamethasone  
Salvage

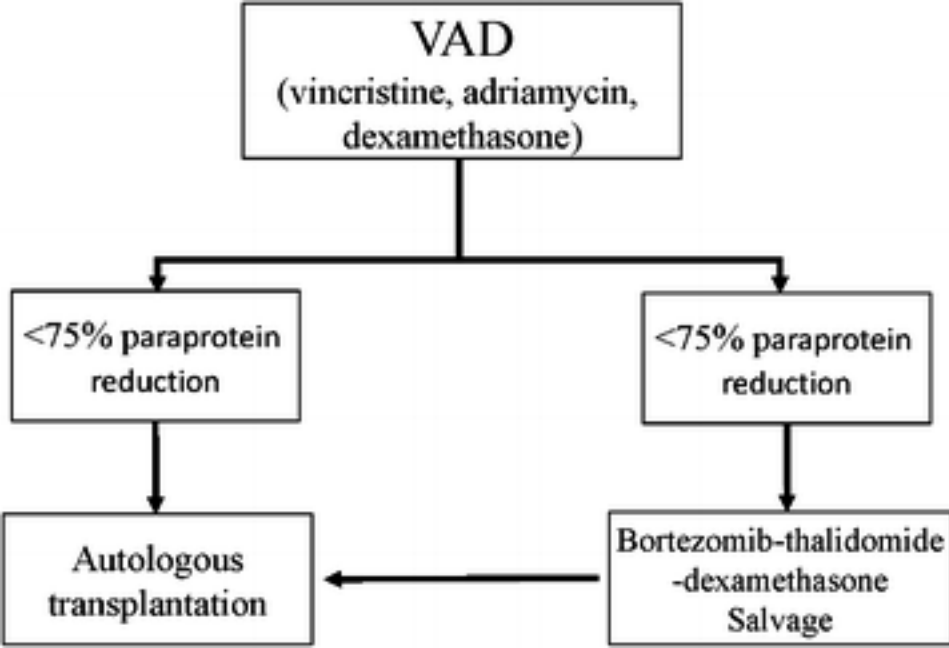

Supplement: MOESM1 [file 9660896]
